# Supplementary material for: Reestablishment of Social Hierarchies in Weaned Pigs after Mixing
Source: Animals (Basel). 2019 Dec 23;10(1):36. doi: 10.3390/ani10010036 (PMC7022989; doi:10.3390/ani10010036)
Supplement: Supplementary file 1 [file animals-10-00036-s001.pdf]

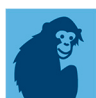

# Supplementary Materials: Reestablishment of Social Hierarchies in Weaned Pigs after Mixing

Xian Tong <sup>1</sup>, Chunyan Shen <sup>1</sup>, Ruonan Chen <sup>1</sup>, Siyuan Gao <sup>1</sup>, Xinpeng Liu <sup>1</sup>, Allan P. Schinckel <sup>2</sup> and Bo Zhou <sup>1,\*</sup>

<sup>1</sup> College of Animal Science and Technology, Nanjing Agricultural University, Nanjing 210095, China; 2017105081@njau.edu.cn (X.T.); 2016105082@njau.edu.cn (C.S.); 2016105033@njau.edu.cn (R.C.); 2018105082@njau.edu.cn (S.G.); 2018805122@njau.edu.cn (X.L.)

<sup>2</sup> Department of Animal Sciences, Purdue University, West Lafayette, IN 47907-2054, USA; aschinck@purdue.edu

\* Corresponding: zhoubo@njau.edu.cn

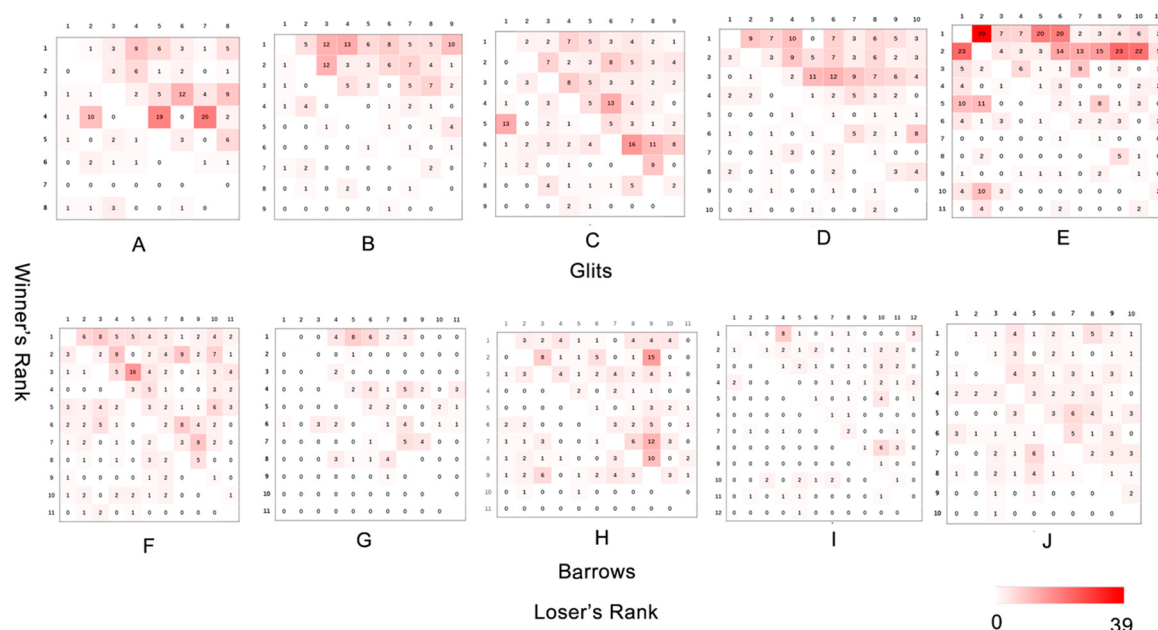

**Figure S1.** Frequency Win-Loss Sociomatrices. Total frequency of agonistic interactions that occurred between all pairs of individuals across all pens (A-J) over the entire observation period. Winners of each pens are listed in rows and losers are listed in columns. Ranks were calculated using the I&SI method. Cells of each matrix are colored on a gradient from white (lowest value in total matrix) to red (highest value in total matrix).

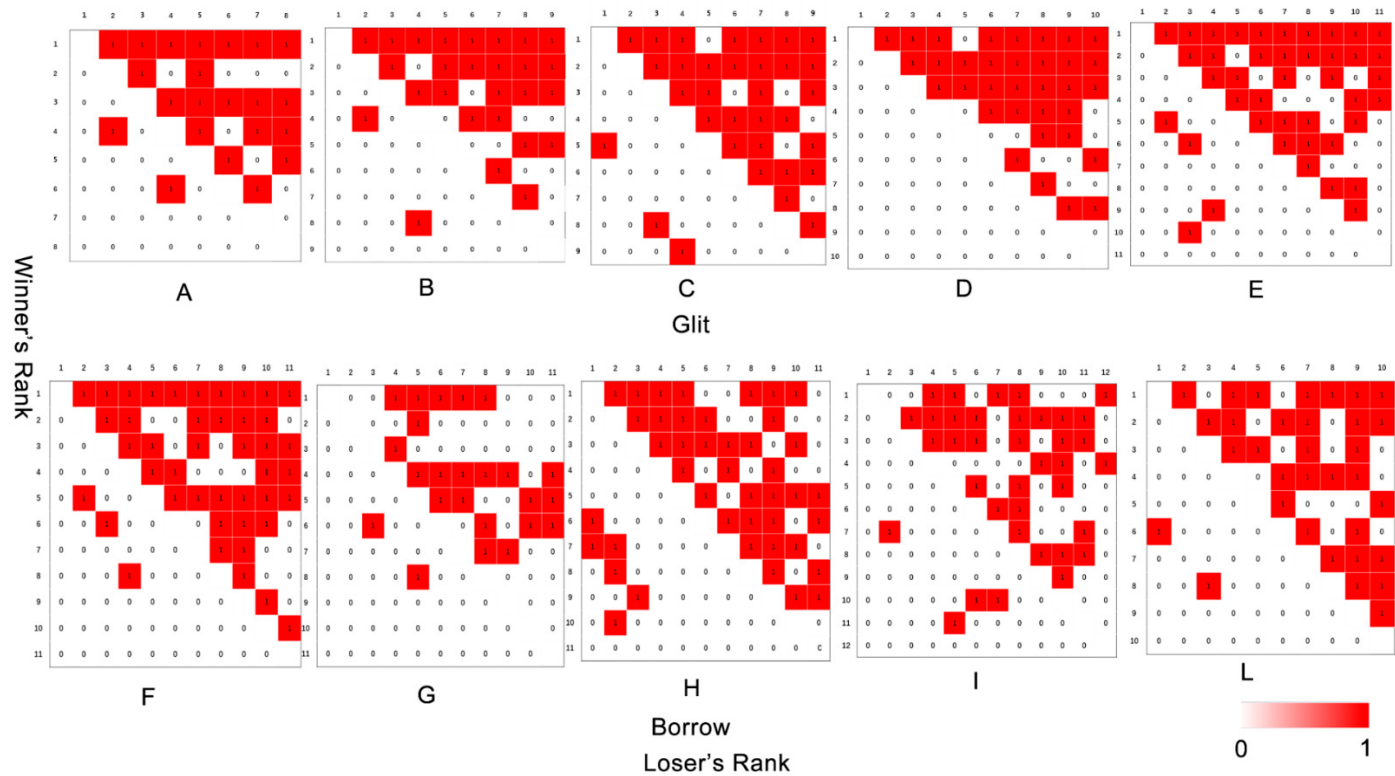

**Figure S2.** Binarized Win-Loss Sociomatrices. For each relationship within each pen, the winner and loser were calculated by determining which individual had the most wins over all observations. Winners of each pen (A–J) are listed in rows and assigned a value of 1. Losers are listed in columns. Ranks were calculated using the I&SI method.
